# Supplementary material for: Therapeutic effects of the combined androgen blockade therapy versus luteinizing hormone-releasing hormone analog monotherapy in patients with hormone naïve metastatic prostate cancer: a multi-institutional comparative analysis
Source: PubMed Central journal article supplement — Transl Androl Urol. 2021 Jan;10(1):417–25. doi: 10.21037/tau-20-966 (PMC7844496; doi:10.21037/tau-20-966), 2021-01
Supplement: tau-10-01-417-dss.pdf [file tau-10-01-417-dss.pdf]

## Data Sharing Statement

|                     |                                                                                                                                                     |                                                                 |
|---------------------|-----------------------------------------------------------------------------------------------------------------------------------------------------|-----------------------------------------------------------------|
| <b>Article Info</b> | <a href="http://dx.doi.org/10.21037/tau-20-966">http://dx.doi.org/10.21037/tau-20-966</a>                                                           |                                                                 |
| <b>Item</b>         | <b>Question</b>                                                                                                                                     | <b>Authors' Response<br/>(place - if not applicable)</b>        |
| 1                   | Would you like to share data collected for your study to others?                                                                                    | Yes                                                             |
| 2                   | If not, would you like to share the reason for your decision?                                                                                       | -                                                               |
| 3                   | What data in particular will be shared?                                                                                                             | Raw data without patient's ID.                                  |
| 4                   | Any other documents will be shared? Such as study protocol, statistical analysis plan, informed consent form, clinical study report, analytic code. | We can share informed consent form and analytic code.           |
| 5                   | When will data availability begin?                                                                                                                  | The data available from 1/Nov/2020.                             |
| 6                   | When will data availability end?                                                                                                                    | The data available to 1/Nov/2021.                               |
| 7                   | To whom will you share the data?                                                                                                                    | To editors and reviewers.                                       |
| 8                   | For what type of analysis or purpose?                                                                                                               | For a replication.                                              |
| 9                   | How or where can the data/documents be obtained?                                                                                                    | From corresponding author, S.H by email.                        |
| 10                  | Any other restrictions?                                                                                                                             | We share information in consideration of participants' privacy. |
